# Supplementary material for: Synthesis of Novel Ultraviolet Absorbers and Preparation and Field Application of Anti-Ultraviolet Aging PBAT/UVA Films
Source: MDPI journal article supplement (doi:10.3390/polym14071434), 2022-03-31
Supplement: s1 [file s1]

## Supplementary Materials

Figure S1. HRMS analysis of UVAs.

Figure S2.  $^1\text{H}$  NMR analysis of UVAs.

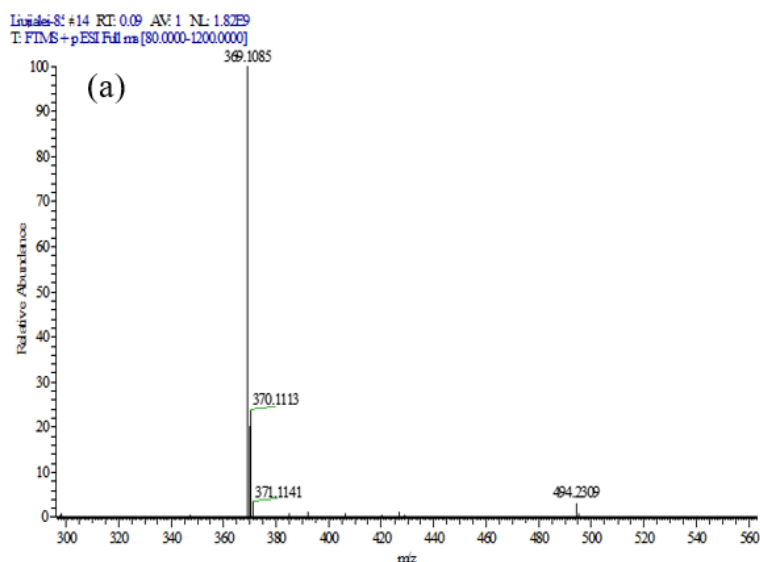

HRMS  $[\text{M} + \text{Na}]^+$  calcd. for  $\text{C}_{22}\text{H}_{18}\text{O}_4^+$  369.1076; found: 369.1085.

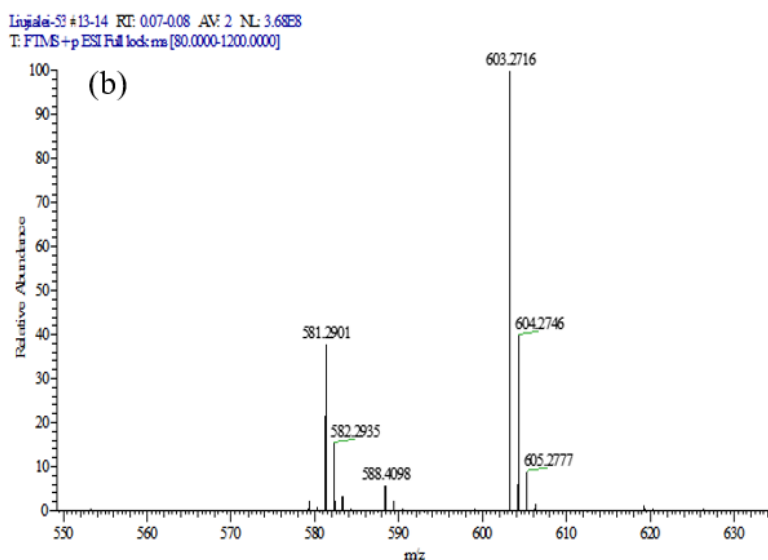

HRMS  $[\text{M} + \text{Na}]^+$  calcd. for  $\text{C}_{37}\text{H}_{40}\text{O}_6^+$  603.2722; found: 603.2716.

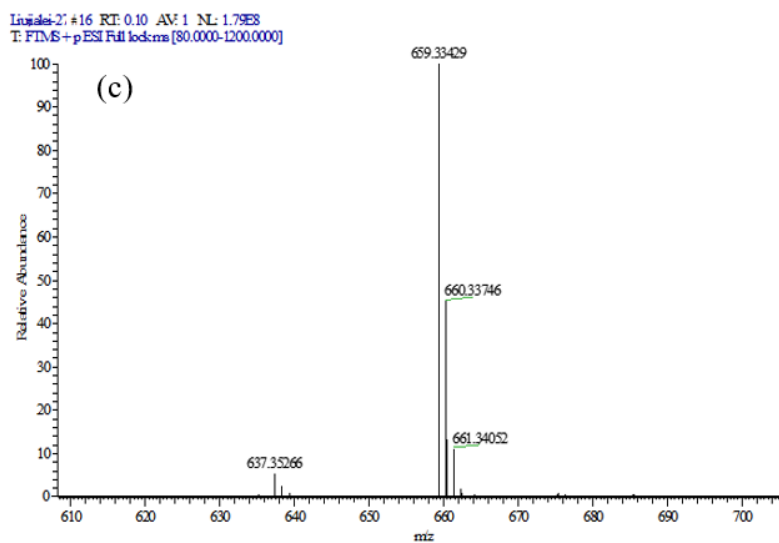

HRMS [M + Na]<sup>+</sup> calcd. for C<sub>41</sub>H<sub>48</sub>O<sub>6</sub><sup>+</sup> 659.3330; found: 659.3343.

**Figure S1.** HRMS spectrum of UVA ((a) UVA-1C, (b) UVA-4C and (c) UVA-6C).

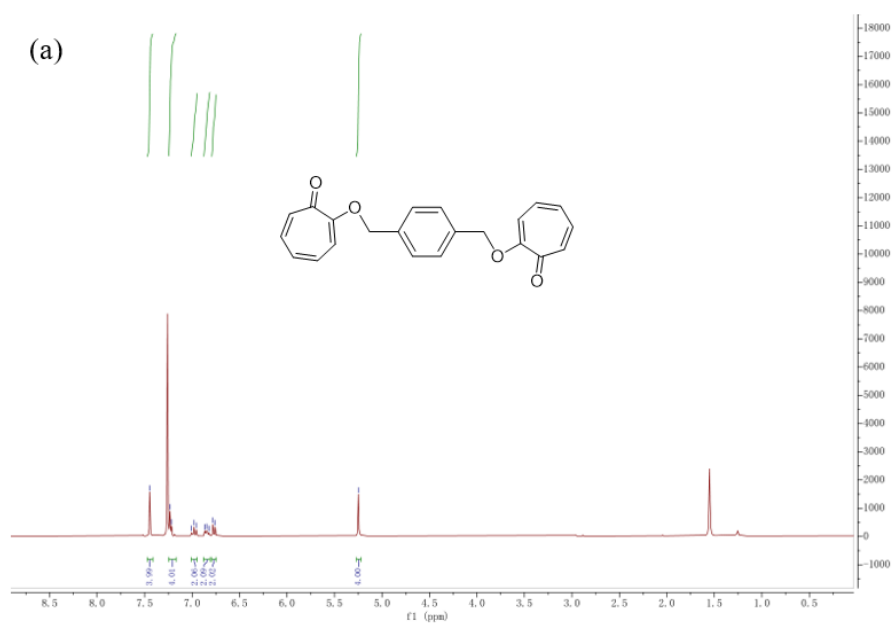

<sup>1</sup>H NMR (400 MHz, CDCl<sub>3</sub>, ppm): δ 7.45 (s, 4H), 7.22-7.23 (m, 4H), 6.98 (t, J=8.0 Hz, 2H), 6.85 (t, J=12.0 Hz, 2H), 6.77 (d, J=8.0 Hz, 2H), 5.25 (s, 4H).

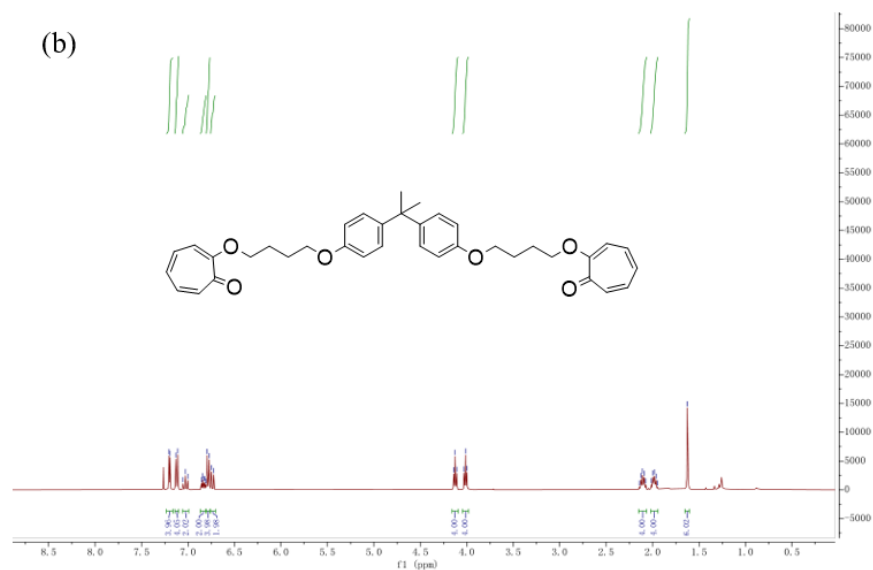

<sup>1</sup>H NMR (400 MHz, CDCl<sub>3</sub>, ppm): δ 7.20 (d, J=8.0 Hz, 4H), 7.12 (d, J=8.0 Hz, 4H), 7.03 (t, J= 8.0 Hz, 2H), 6.86–6.81 (m, 2H), 6.78 (d, J=8.0 Hz, 4H), 6.73 (d, J=12.0 Hz, 2H), 4.13 (t, J= 8.0 Hz, 4H), 4.01 (t, J=8.0 Hz, 4H), 2.14–2.07 (m, 4H), 2.01–1.95 (m, 4H), 1.63 (s, 6H).

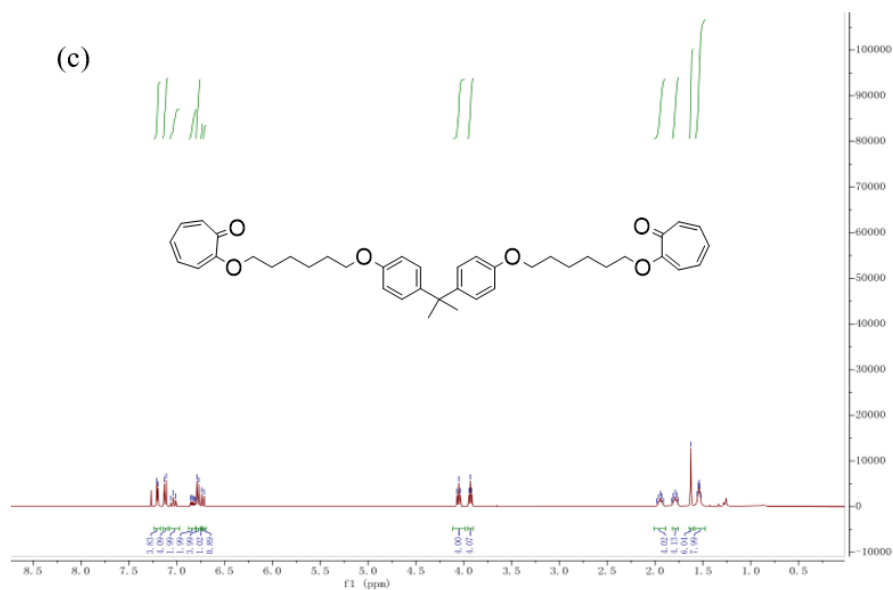

<sup>1</sup>H NMR (400 MHz, CDCl<sub>3</sub>, ppm): δ 7.20 (d, J=4.0 Hz, 4H), 7.12 (d, J=8.0 Hz, 4H), 7.03 (t, J= 12.0 Hz, 2H), 6.85–6.80 (m, 2H), 6.78 (d, J=8.0 Hz, 4H), 6.74 (s, 1H), 6.71 (s, 1H), 4.05 (t, J=8.0 Hz, 4H), 3.93 (t, J=8.0 Hz, 4H), 1.98–1.91 (m, 4H), 1.82–1.76 (m, 4H), 1.63 (s, 6H), 1.56–1.52 (m, 8H).

**Figure S2.** <sup>1</sup>H NMR spectrum of UVA ((a) UVA-1C, (b) UVA-4C and (c) UVA-6C).
